# Supplementary material for: Effects of Dietary Supplementation of Solubles from Shredded, Steam-Exploded Pine Particles on the Performance and Cecum Microbiota of Acute Heat-Stressed Broilers
Source: MDPI journal article supplement (doi:10.3390/microorganisms10091795), 2022-09-06
Supplement: s1 [file s1]

**Table S1.** The temperature of the room was maintained from the first week of age until the start of the acute heat stress experiment. The relative humidity was maintained at 50% to 60% throughout the experiment.

| Age (day)         | Temperature °C |
|-------------------|----------------|
| 7                 | 27.7 – 29.9    |
| 9                 | 26.7 – 28.6    |
| 12                | 25.7 – 27.8    |
| 15                | 24.8 – 26.8    |
| 18                | 23.6 – 25.5    |
| 21                | 22.7 – 24.7    |
| 24                | 21.7 – 23.5    |
| 27 and thereafter | 20.7 – 22.7    |

**Table S2.** Effects of supplementing diets with solubles from shredded, steam-exploded pine particles (SSPP) on the most prevalent Bacteroidetes and Firmicutes in the cecum of broiler chickens exposed to either thermoneutral or heat-stress conditions.

| Phylum        | Genus              | 0% NT | 0% HS | 0.1% HS | 0.4% HS |
|---------------|--------------------|-------|-------|---------|---------|
| Bacteroidetes | Bacteroides        | 21.4  | 16.4  | 16.4    | 14.7    |
|               | Parabacteroides    | 11.2  | 15.6  | 16.5    | 14.4    |
| Firmicutes    | Kurthia            | 11.2  | 10.0  | 10.8    | 2.1     |
|               | Faecalibacterium   | 4.1   | 5.9   | 9.0     | 11.0    |
|               | Mediterraneibacter | 5.3   | 7.0   | 2.1     | 7.8     |
|               | Acetivibrio        | 1.9   | 2.8   | 4.2     | 7.7     |
|               | Enterococcus       | 8.4   | 4.9   | 0.4     | 2.9     |
|               | Kineothrix         | 5.3   | 1.7   | 4.3     | 2.0     |
|               | Lactobacillus      | 1.6   | 4.7   | 1.8     | 2.1     |
|               | Christensenella    | 1.3   | 3.0   | 2.3     | 2.6     |
|               | Saccharofermentans | 2.2   | 2.4   | 2.7     | 1.7     |
|               | Enterocloster      | 1.6   | 1.0   | 0.8     | 2.3     |

Chickens were fed with diets containing 0% (control), 0.1%, and 0.4% solubles from shredded, steam-exploded pine particles (SSPP) from the 8<sup>th</sup> day to the 36<sup>th</sup> day of age. On 37<sup>th</sup> day, birds were either kept at thermoneutral temperature (21.0 °C) and provided control diet (0% NT) or heat-stressed at 31.0 °C for six hours and supplemented with 0% (0% HS), 0.1% (0.1% HS) and 0.4% (0.4% HS) SSPP in diets. The table represents the top two Bacteroidetes and the top ten Firmicutes. Data show mean ± SEM (n = 6). Abbreviations: NT, normal temperature; HS, heat stress.
